# Supplementary material for: Chitosan Oligosaccharide Supplementation Affects Immunity Markers in Ewes and Lambs during Gestation and Lactation
Source: MDPI journal article supplement (doi:10.3390/ani12192609), 2022-09-28
Supplement: s1 [file s1]

**Table S1.** The nutrient and mineral content in the commercial loose lick.

| Nutrient and mineral break down |              |                  |           |
|---------------------------------|--------------|------------------|-----------|
| ANP - StockMins CLS             |              |                  |           |
| Daily intake (kg/hd/day)        | 0.025        |                  |           |
| Macro analysis                  |              |                  |           |
| <u>Paramater</u>                | <u>%</u>     | <u>g/hd/day</u>  |           |
| Dry matter                      | 97.39        |                  |           |
| Mj ME/kg DM                     | 0.48         | 0                | Mj ME/day |
| CP                              | 0.24         | 0                |           |
| NDF                             | 0.02         | 0                |           |
| ADF                             | 0.01         |                  |           |
| NFC                             | 0.00         |                  |           |
| Fat                             | 0.02         | 0                |           |
| Starch                          | 0.01         | 0                |           |
| Sugar                           | 2.52         | 1                |           |
| Macro mineral analysis          |              |                  |           |
| <u>Mineral</u>                  | <u>%</u>     | <u>g/hd/day</u>  |           |
| Ash                             | 61.01        | 15.3             |           |
| Ca                              | 10.97        | 2.7              |           |
| P                               | 0.00         | 0.0              |           |
| Mg                              | 16.23        | 4.1              |           |
| K                               | 0.16         | 0.0              |           |
| S                               | 0.02         | 0.0              |           |
| Na                              | 11.93        | 3.0              |           |
| Cl                              | 18.28        | 4.6              |           |
| Micro mineral analysis          |              |                  |           |
| <u>Mineral</u>                  | <u>mg/kg</u> | <u>mg/hd/day</u> |           |
| Co                              | 0            | 0                |           |
| Cu                              | 3            | 0                |           |
| I                               | 0            | 0                |           |
| Fe                              | 11           | 0                |           |
| Mn                              | 2            | 0                |           |
| Se                              | 0            | 0.00             |           |
| Zn                              | 1            | 0                |           |
| Mo                              | 0            | 0.00             |           |
| Vitamins analysis               |              |                  |           |
| <u>Vitamin</u>                  | <u>IU/kg</u> | <u>IU/hd/day</u> |           |
| Vitamin A                       | 0            | 0                |           |
| Vitamin D                       | 0            | 0                |           |
| Vitamin E                       | 0            | 0                |           |
|                                 | <u>mg/kg</u> | <u>mg/hd/day</u> |           |
| Vitamin B1                      | 0            | 0                |           |
| Vitamin B6                      | 0            | 0                |           |
| Additives                       |              |                  |           |
|                                 | <u>mg/kg</u> | <u>mg/hd/day</u> |           |
| Lasalocid                       | 0            | 0                |           |
| DCAD                            | 60           | mEq/kg           |           |
